# Supplementary material for: Clean synthesis of crystalline p-nitrobenzyl bromide from p-nitrotoluene with zero organic discharge
Source: Royal Society of Chemistry journal article supplement (doi:10.1039/c2ra20940c), 2012-01-01
Supplement: c2ra20940c.pdf [file c2ra20940c.pdf]

Electronic Supplementary Material (ESI) for Green Chemistry

This journal is © The Royal Society of Chemistry [year]

Supporting information

## Clean synthesis of *p*-nitrotoluene from crystalline *p*-nitrobenzylbromide with zero organic discharge

Milan Dinda,<sup>a</sup> Manoj K. Agrawal,<sup>a,b</sup> Mahesh R. Gandhi,<sup>a</sup> Sumesh C. Upadhyay,<sup>a</sup> Subbarayappa Adimurthy,<sup>a</sup> Supratim Chakraborty,<sup>a</sup> and Pushpito K. Ghosh<sup>\*,a</sup>

<sup>a</sup>Central Salt and Marine Chemicals Research Institute, Council of Scientific & Industrial Research, G. B. Marg, Bhavnagar –364 002, India

<sup>b</sup> Present Address: Generic Division, Lupin Research Park, Survey No. 46/47A Nande Village, Mulshi Taluka, Pune 411042, Maharashtra, India

\*E-mail: [pkgghosh@csmcri.org](mailto:pkgghosh@csmcri.org); Fax: +91-278-2567562

**Warning:** *p*-Nitrobenzyl bromide is a skin irritant and due care must be taken during handling and work up.

### Analytical Data

#### GC-MS Data

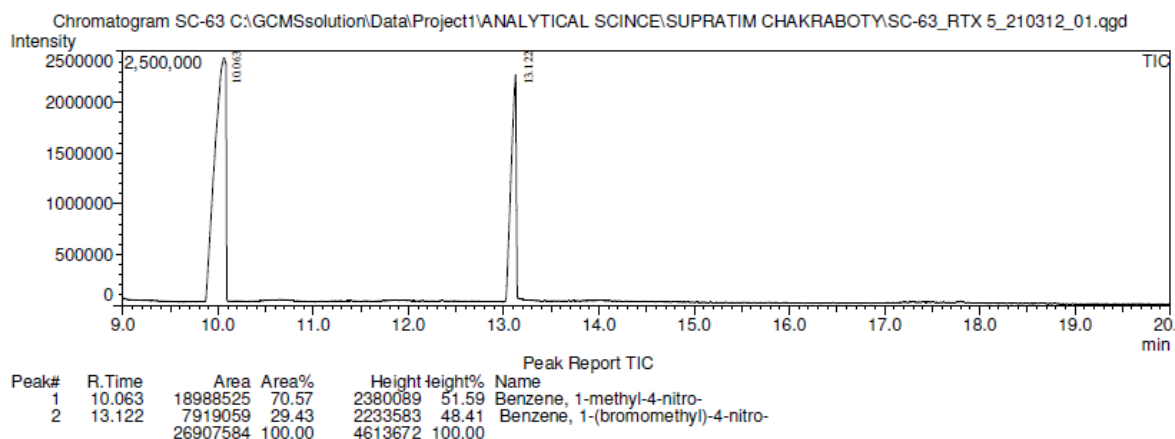

**Fig S1.** GC-MS of 3.0551 g (22.3 mmol) PNT and 2.4084 g (11.15 mmol) PNBBBr (2:1, [PNT]:[PNBBBr]) in 20 mL EDC for quantification of yields taking into account response factor

Electronic Supplementary Material (ESI) for Green Chemistry

This journal is © The Royal Society of Chemistry [year]

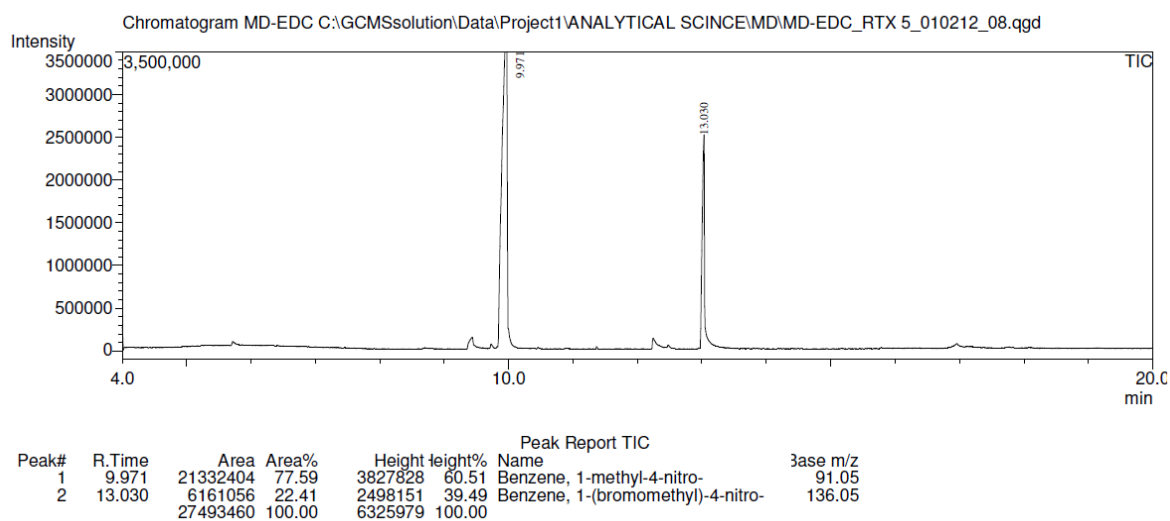

**Fig S2.** GC-MS of reaction mixture upon reaction with NBS (5 mmol substrate; 3:1 molar ratio of substrate to reagent) at 80°C under illumination with 100 W tungsten lamp

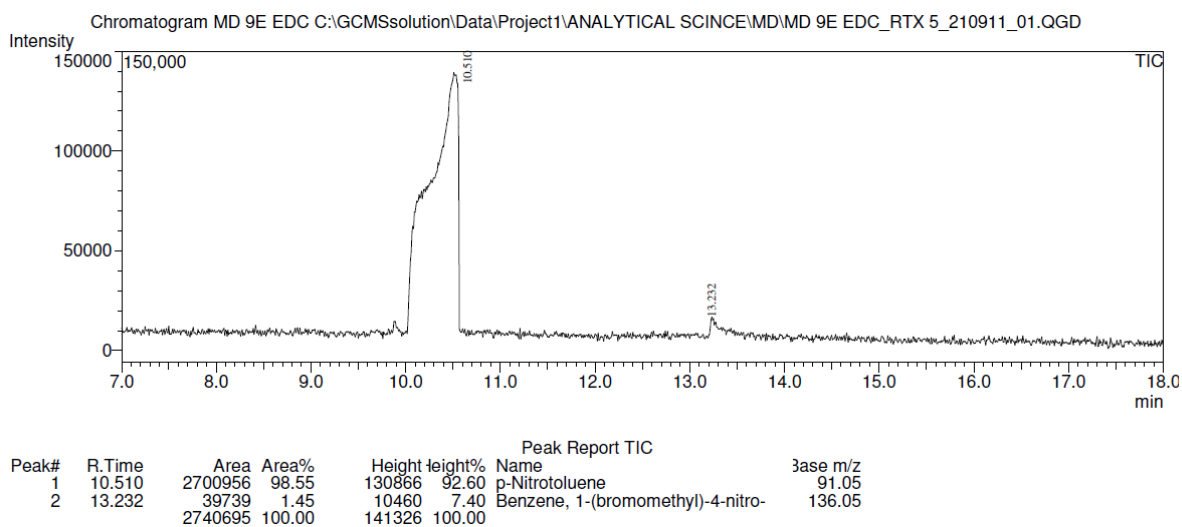

**Fig. S3.** GC-MS of reaction mixture upon reaction with *BR-S* (5 mmol substrate; 3:1 molar ratio of substrate to reagent) at 80°C in the absence of light

Electronic Supplementary Material (ESI) for Green Chemistry

This journal is © The Royal Society of Chemistry [year]

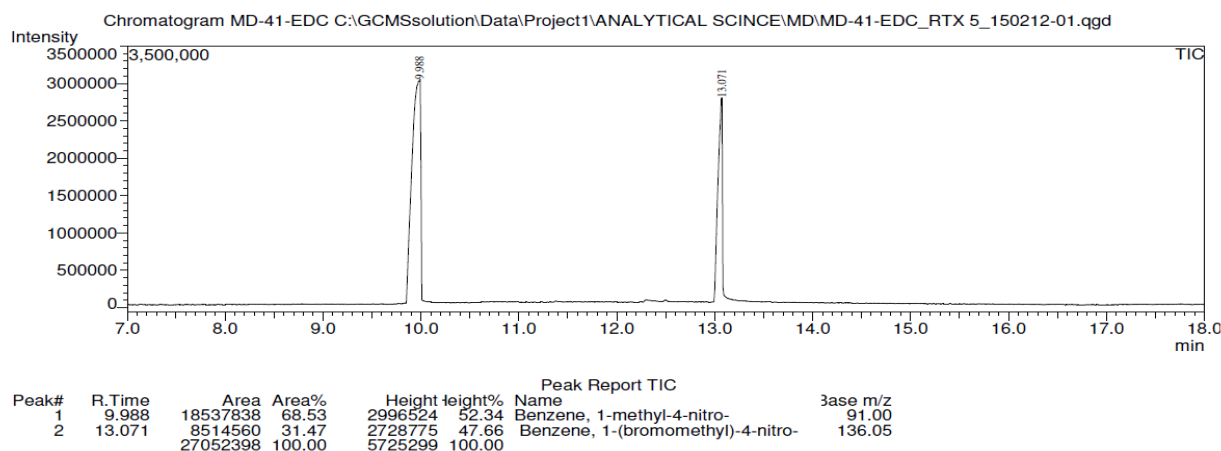

**Fig. S4.** The figure shows the GC-MS of the reaction mixture of Batch 1, Table 1. When corrected for response factor using the data of Figure S1, the observed peak areas of PNT and PNBBr tallied well with the values computed for a 1.9:1.1 molar ratio of PNT to PNBBr expected for quantitative formation of product in Batch 1.

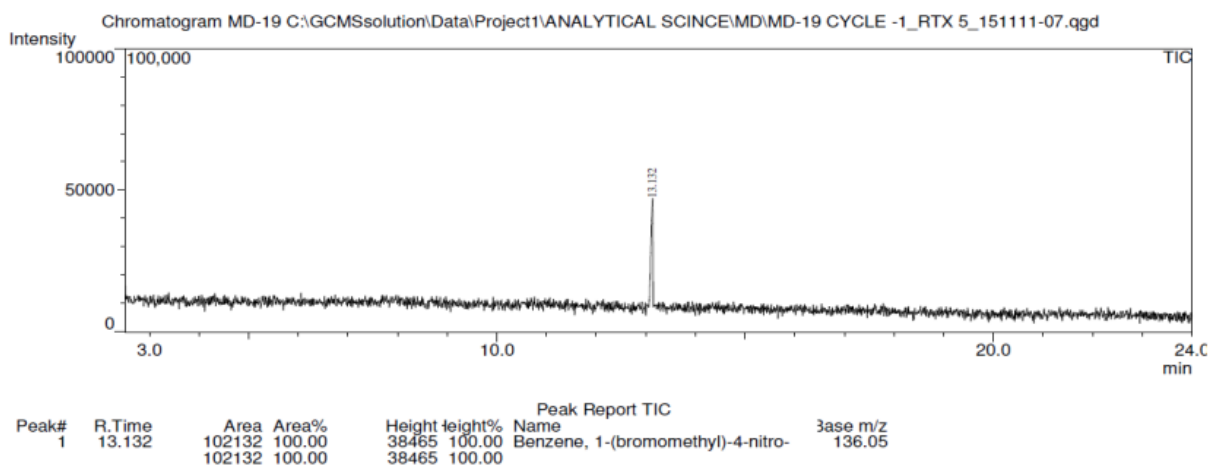

**Fig. S5.1.** GC-MS of crystallized product from Batch 1

Electronic Supplementary Material (ESI) for Green Chemistry

This journal is © The Royal Society of Chemistry [year]

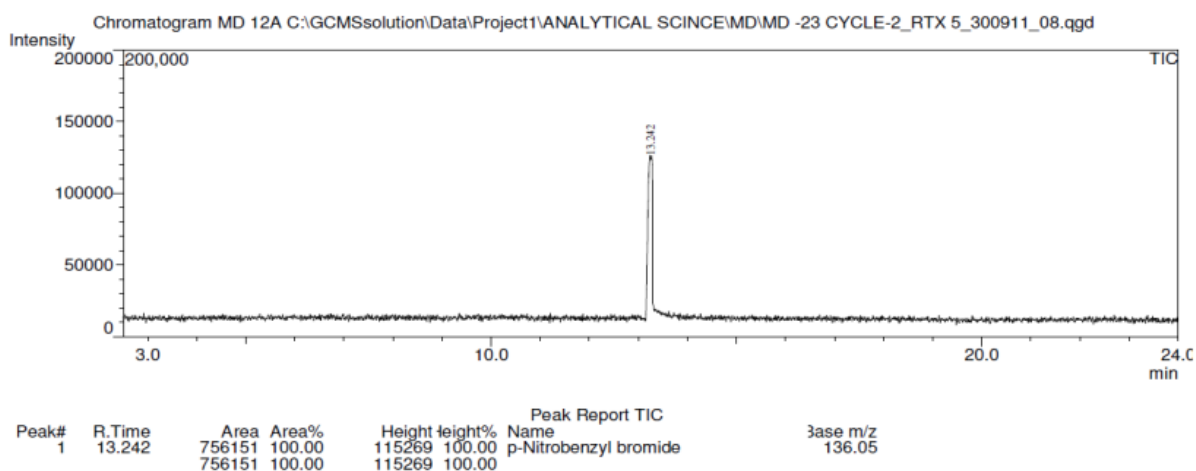

Fig. S5.2. GC-MS of crystallized product from Batch 2

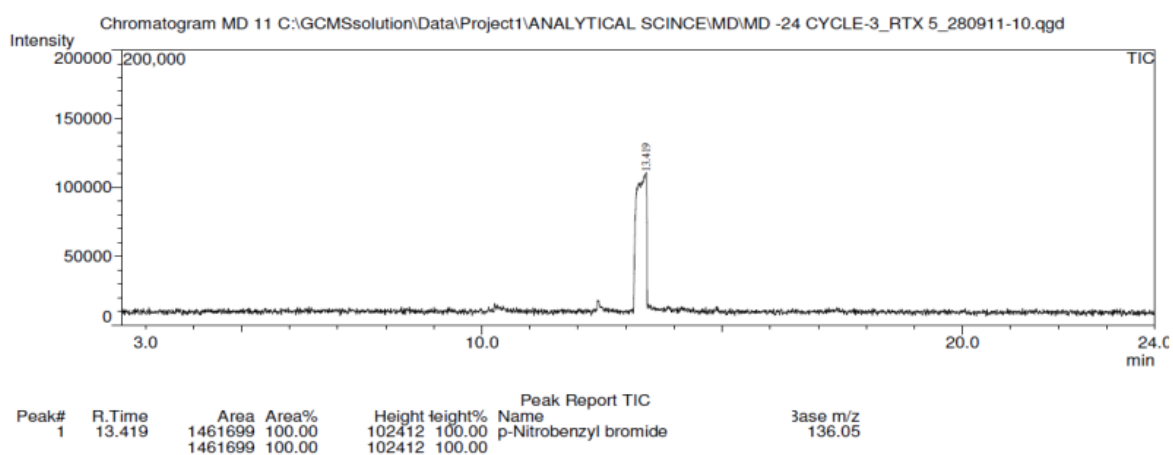

Fig. S5.3. GC-MS of crystallized product from Batch 3

Electronic Supplementary Material (ESI) for Green Chemistry

This journal is © The Royal Society of Chemistry [year]

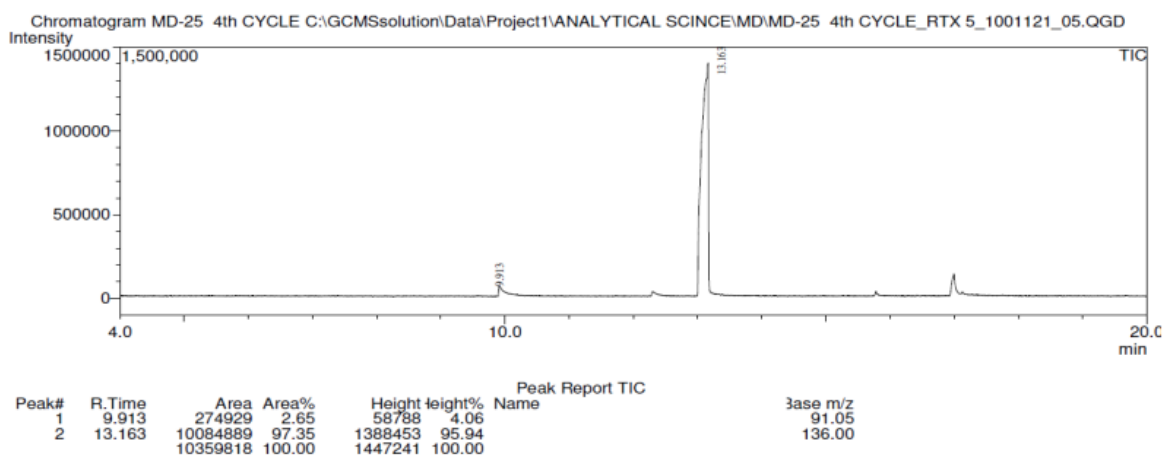

Fig. S5.4. GC-MS of crystallized product from Batch 4

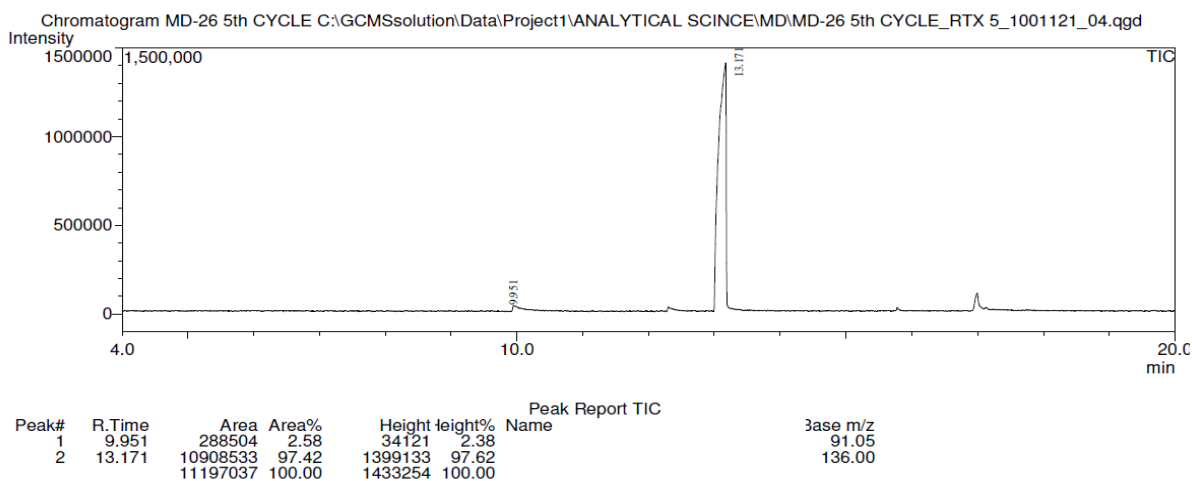

Fig. S5.5. GC-MS of crystallized product from Batch 5

Electronic Supplementary Material (ESI) for Green Chemistry

This journal is © The Royal Society of Chemistry [year]

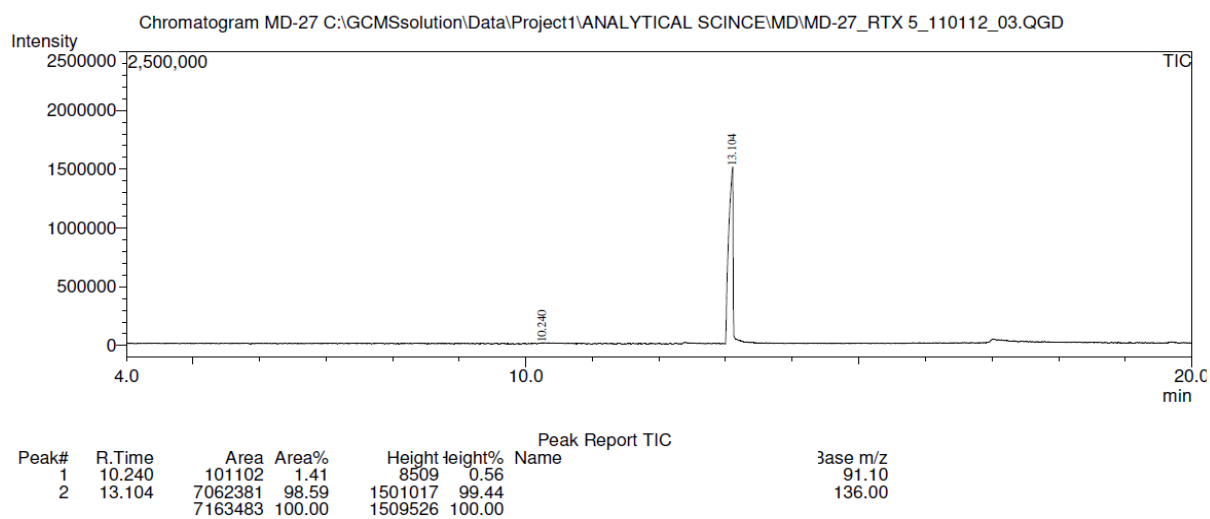

**Fig. S5.6.** GC-MS of crystallized product from Batch 6

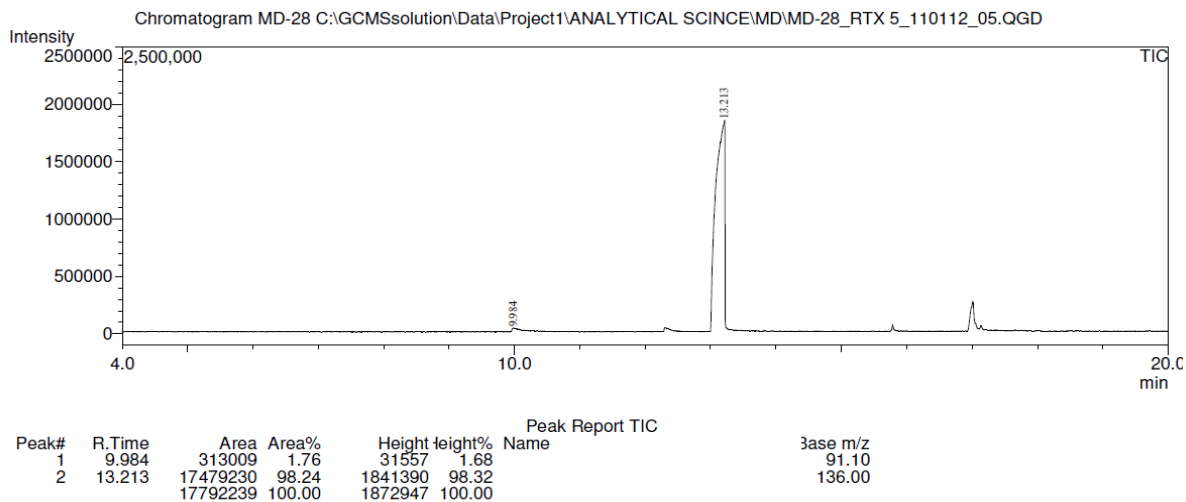

**Fig. S5.7.** GC-MS of crystallized product from Batch 7

Electronic Supplementary Material (ESI) for Green Chemistry

This journal is © The Royal Society of Chemistry [year]

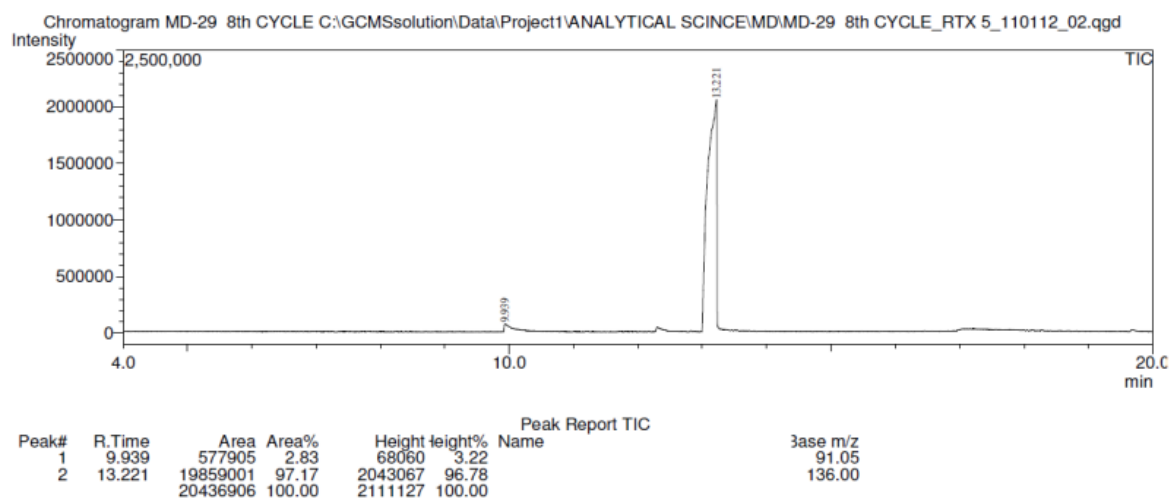

Fig. S5.8. GC-MS of crystallized product from Batch 8

**NaBH<sub>4</sub> reduction of the mother liquor after 8<sup>th</sup> batch:**

**GC-MS Data:**

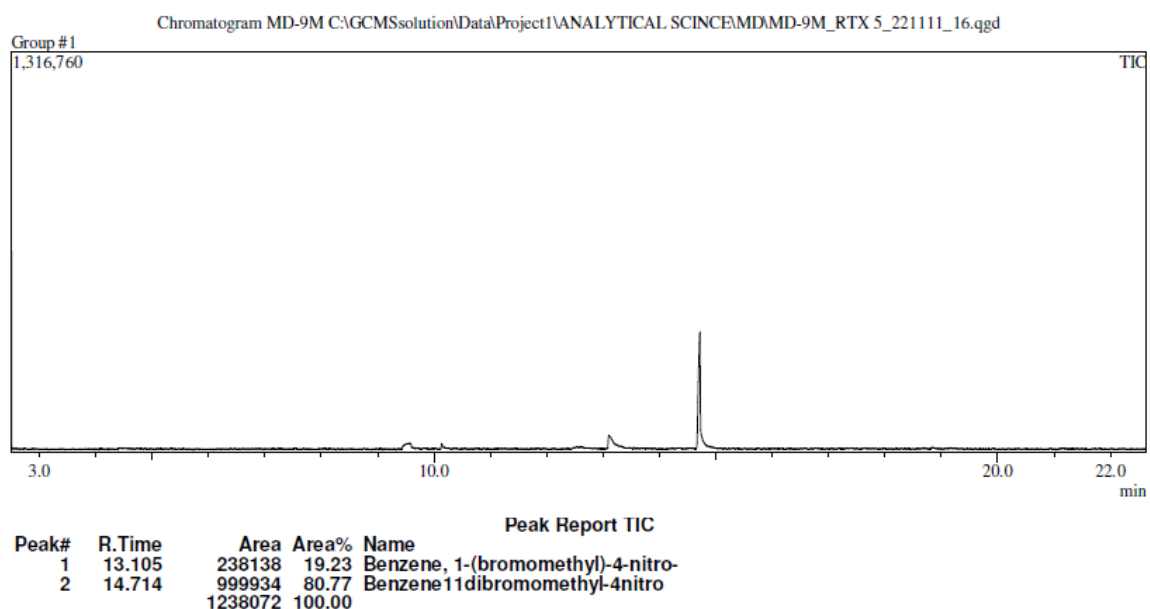

Figure S6.1 (Table S3, Entry 1)

Electronic Supplementary Material (ESI) for Green Chemistry

This journal is © The Royal Society of Chemistry [year]

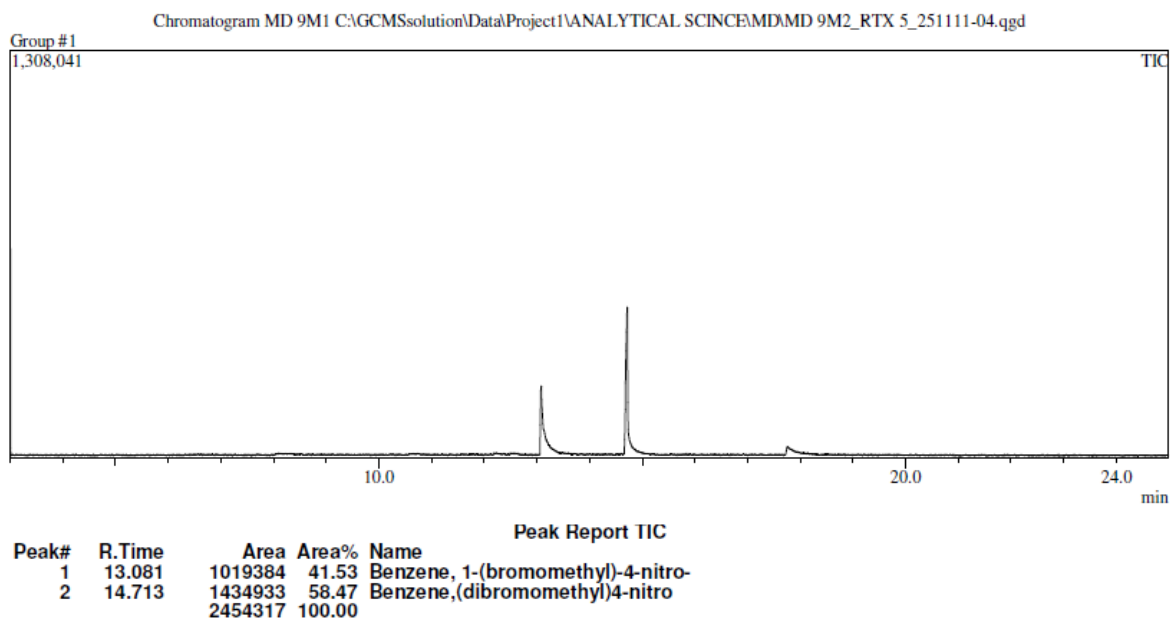

Figure S6.2 (Table S3, Entry 2)

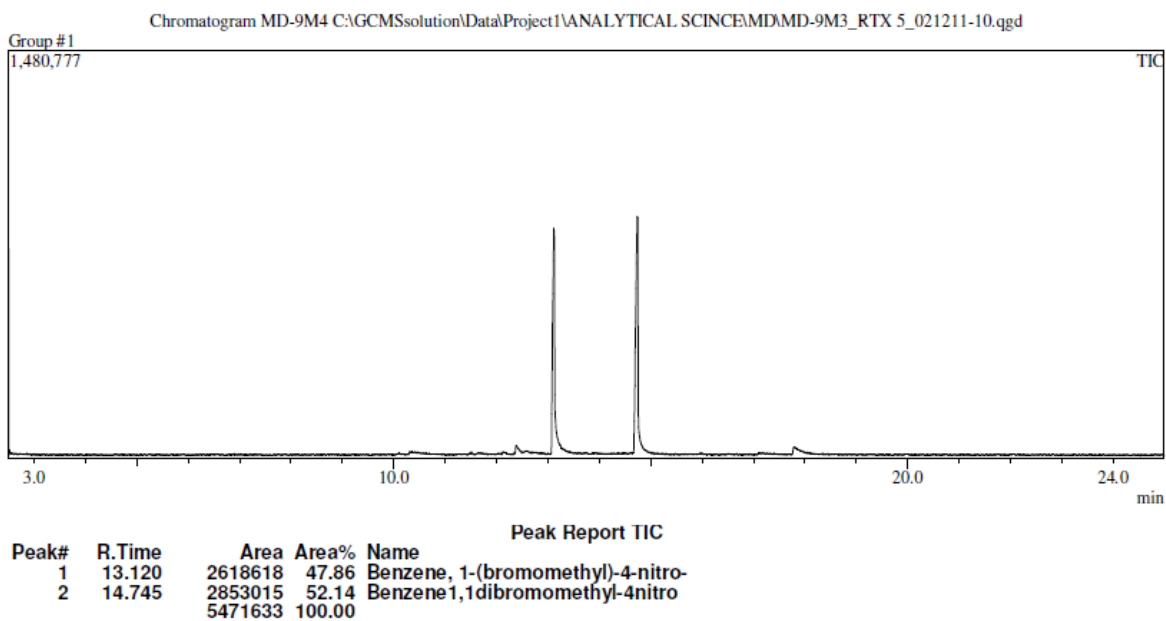

Figure S6.3 (Table S3, Entry 3)



Electronic Supplementary Material (ESI) for Green Chemistry

This journal is © The Royal Society of Chemistry [year]

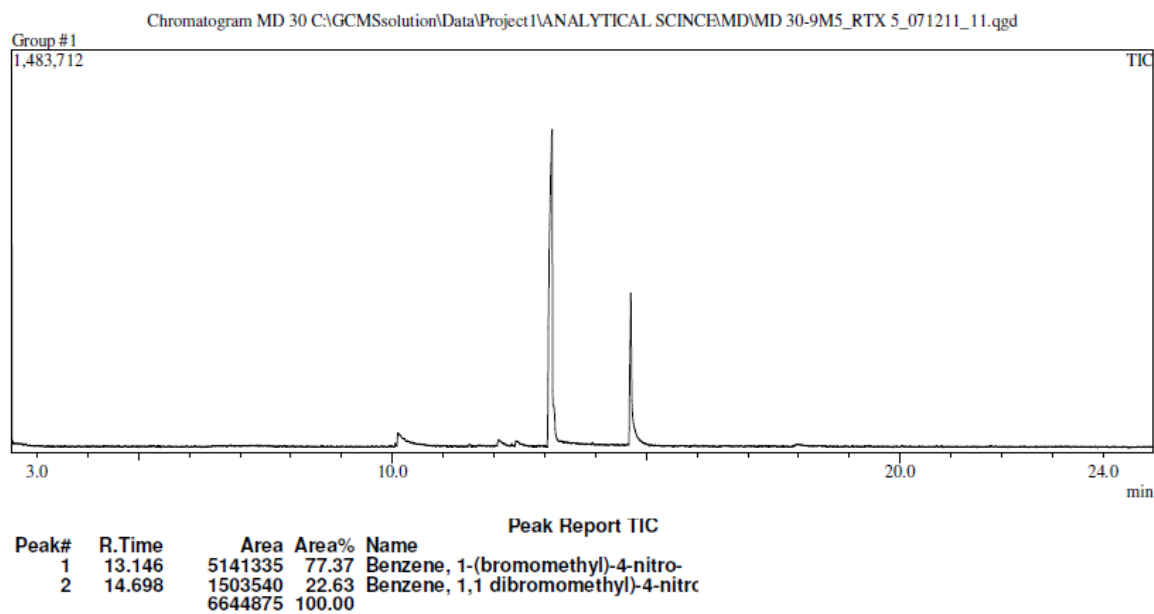

Figure S6.4 (Table S3, Entry 4)

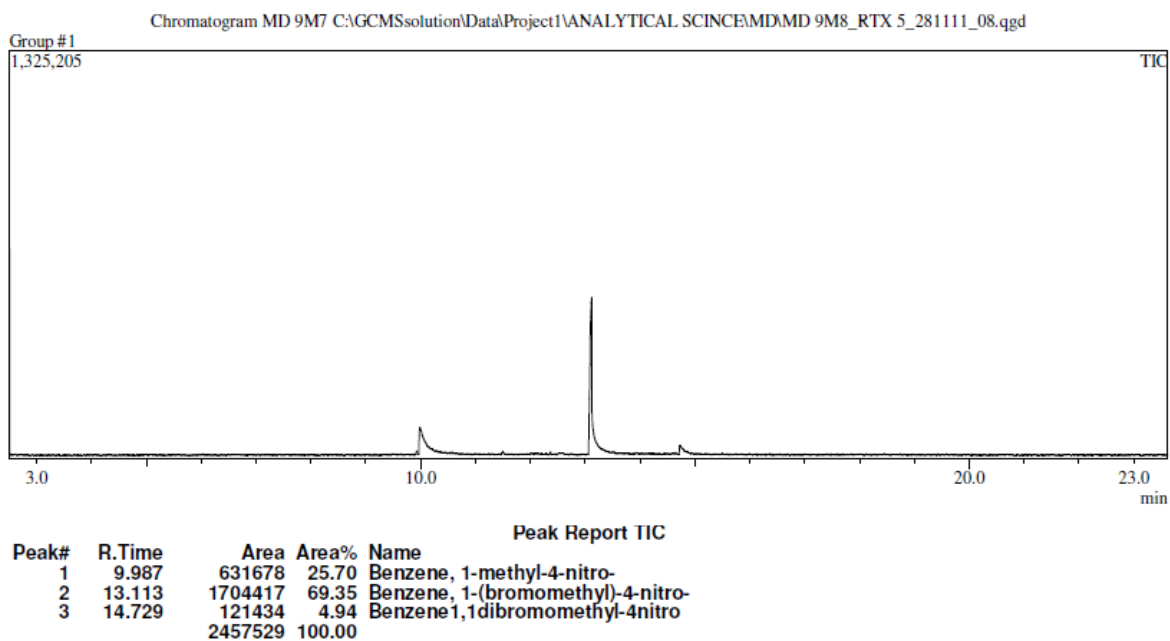

Figure S6.5 (Table S3, Entry 5)

Electronic Supplementary Material (ESI) for Green Chemistry

This journal is © The Royal Society of Chemistry [year]

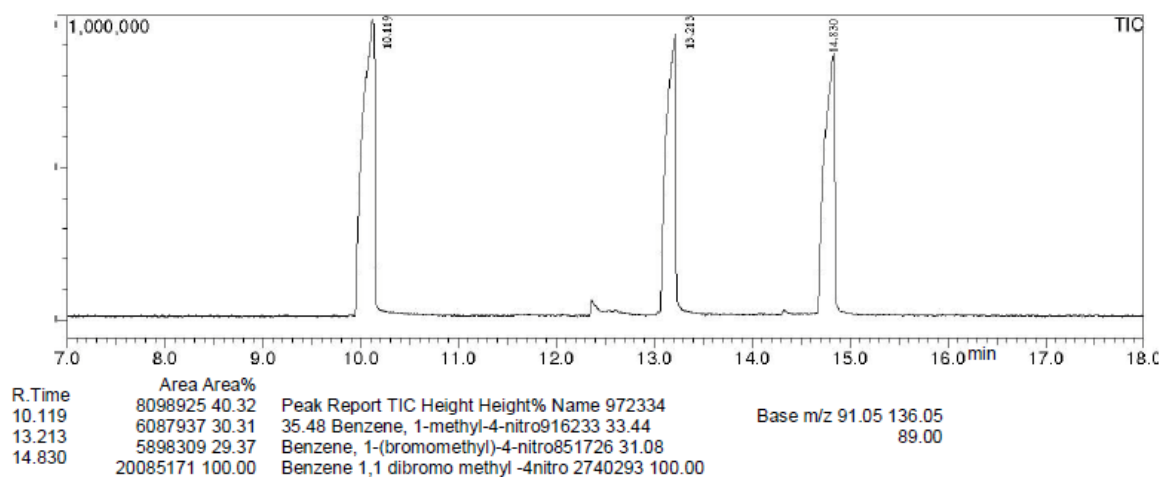

Fig. S7.1. Mother liquor of Table 1 before debromination with NaBH<sub>4</sub>

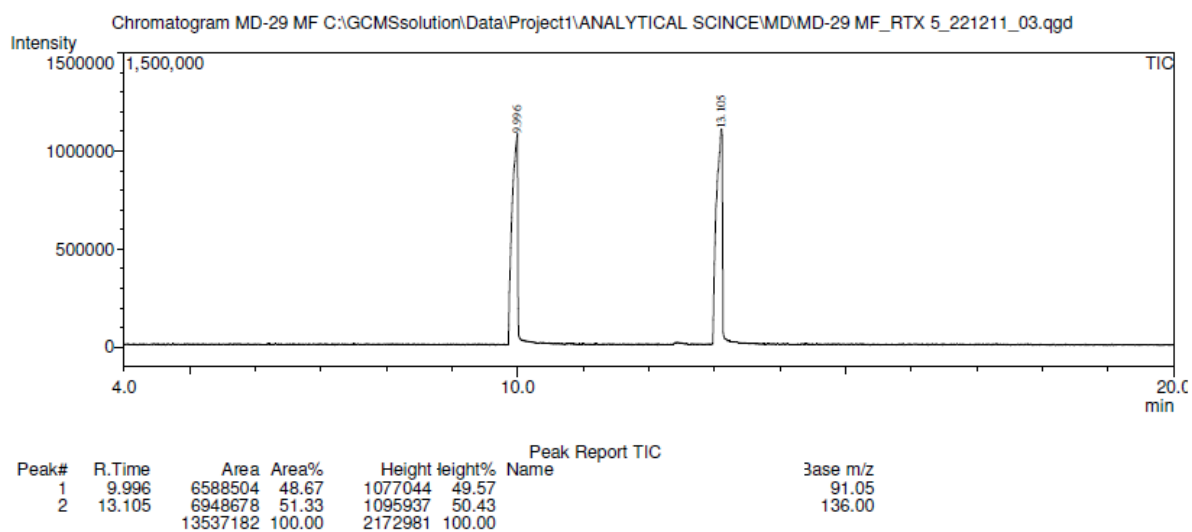

Fig. S7.2. Mother liquor of Table 1 after debromination with NaBH<sub>4</sub>

Electronic Supplementary Material (ESI) for Green Chemistry

This journal is © The Royal Society of Chemistry [year]

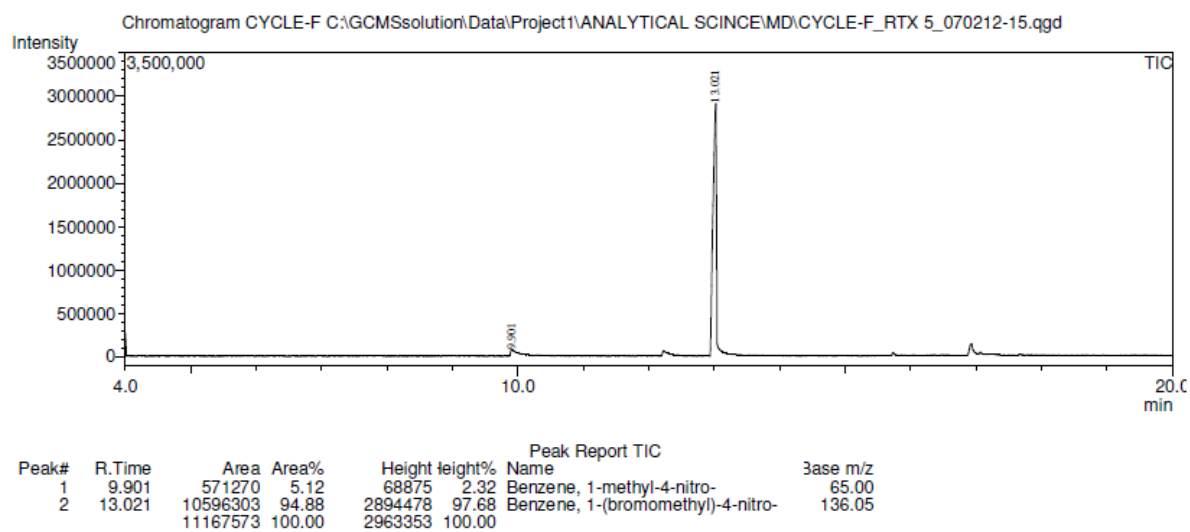

**Fig. S8.** GC-MS of composite of the isolated products from Batches 1- 8, Table 1.

Electronic Supplementary Material (ESI) for Green Chemistry

This journal is © The Royal Society of Chemistry [year]

## NMR ( $^1\text{H}$ ; $^{13}\text{C}$ NMR) and IR data of PNBBBr

### 1) *p* - nitrobenzyl bromide (PNBBBr) (Table 1, Entry 1, Fig. S5.1)

$^1\text{H}$  NMR ( $\text{CDCl}_3$ -500 MHz):  $\delta$  8.21-8.23 (2H, d,  $J=8.5$ ); 7.58-7.6 (2H, d,  $J=8.5$ ); 4.55 (2H, S).

$^{13}\text{C}$  NMR ( $\text{CDCl}_3$ -500 MHz):  $\delta$  147.7, 144.8, 129.9 (2C), 124.0 (2C), 31.0

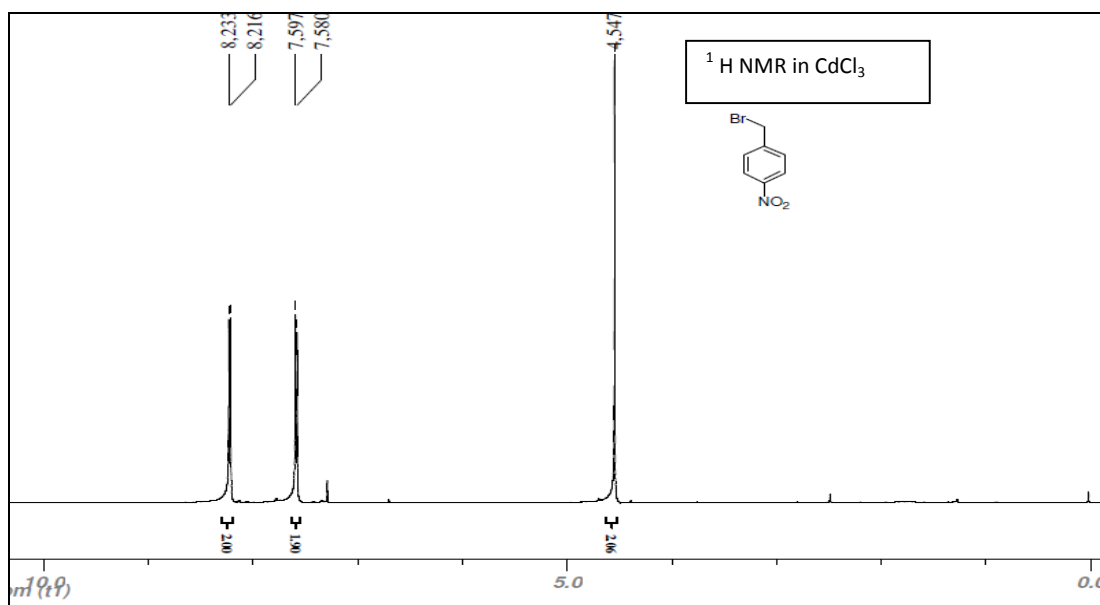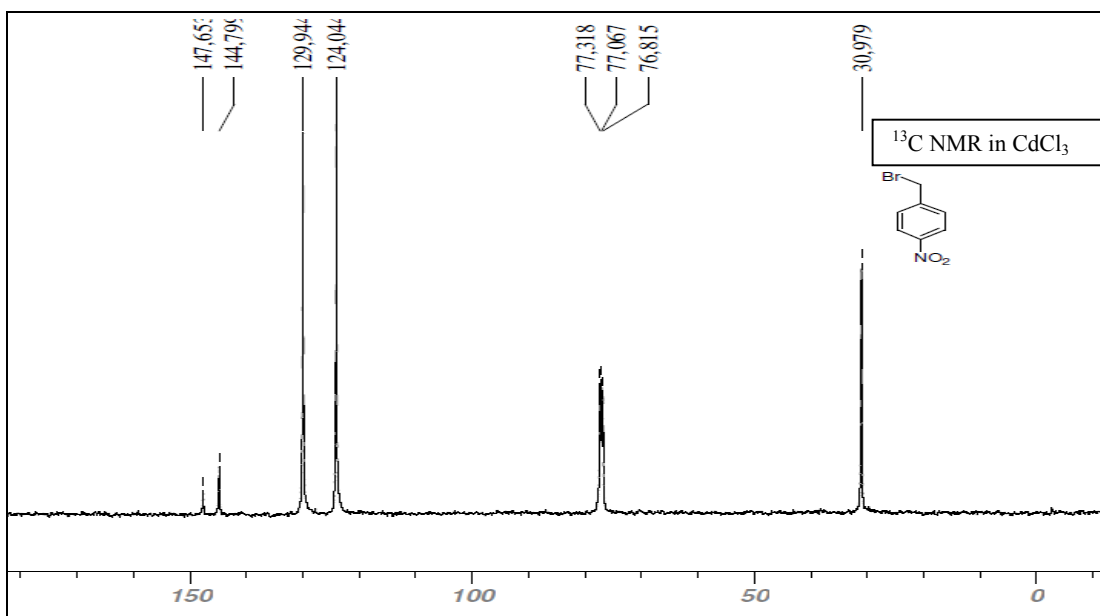

Electronic Supplementary Material (ESI) for Green Chemistry

This journal is © The Royal Society of Chemistry [year]

### IR data

$V_{\max}$  (KBr): 3051, 2840, 2378, 1604, 1534, 1344, 1224, 1099, 1011, 874, 798, 692, 592  $\text{cm}^{-1}$

### NMR ( $^1\text{H}$ ; $^{13}\text{C}$ NMR) data of PNBBr<sub>2</sub>

#### 2) 1-(dibromomethyl)-4-nitrobenzene

$^1\text{H}$  NMR ( $\text{CDCl}_3$ -200 MHz):  $\delta$  8.24-8.2 (2H, d,  $J=8.6$ ); 7.76-7.72 (2H, d,  $J=8.4$ ); 6.664 (1H, S).

$^{13}\text{C}$  NMR ( $\text{CDCl}_3$ -200 MHz):  $\delta$  148.3, 147.9, 127.9 (2C), 124.1 (2C), 38.6

Note: Minor peaks are ascribed to PNT and PNBBr impurities

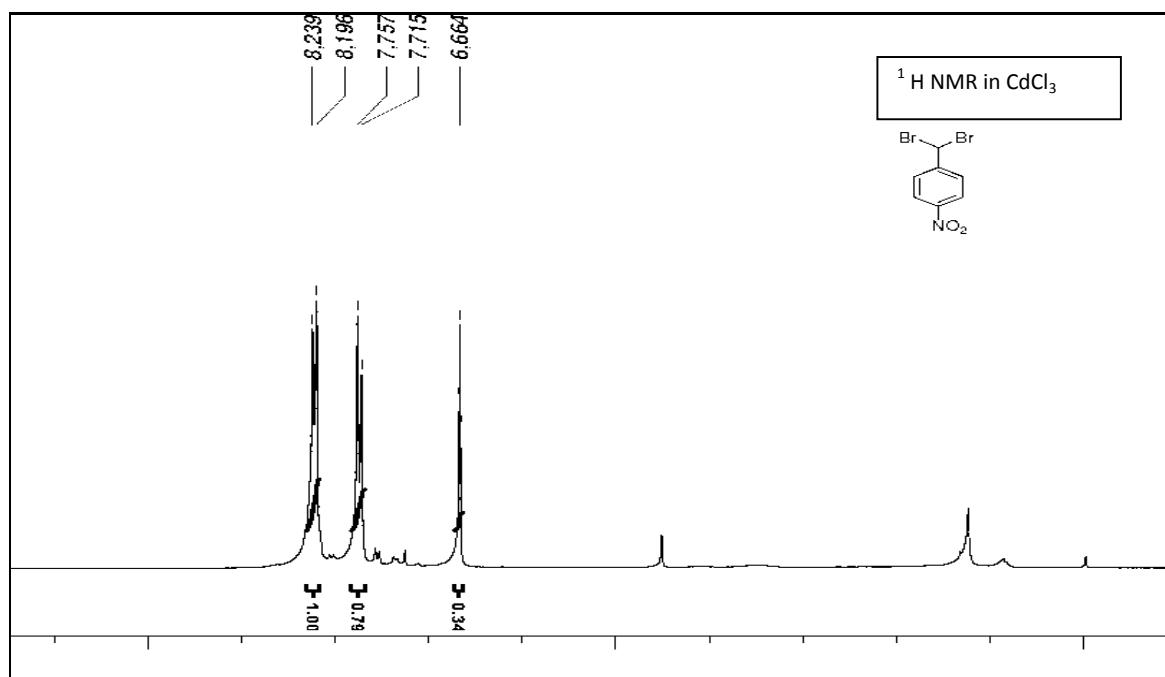

Electronic Supplementary Material (ESI) for Green Chemistry

This journal is © The Royal Society of Chemistry [year]

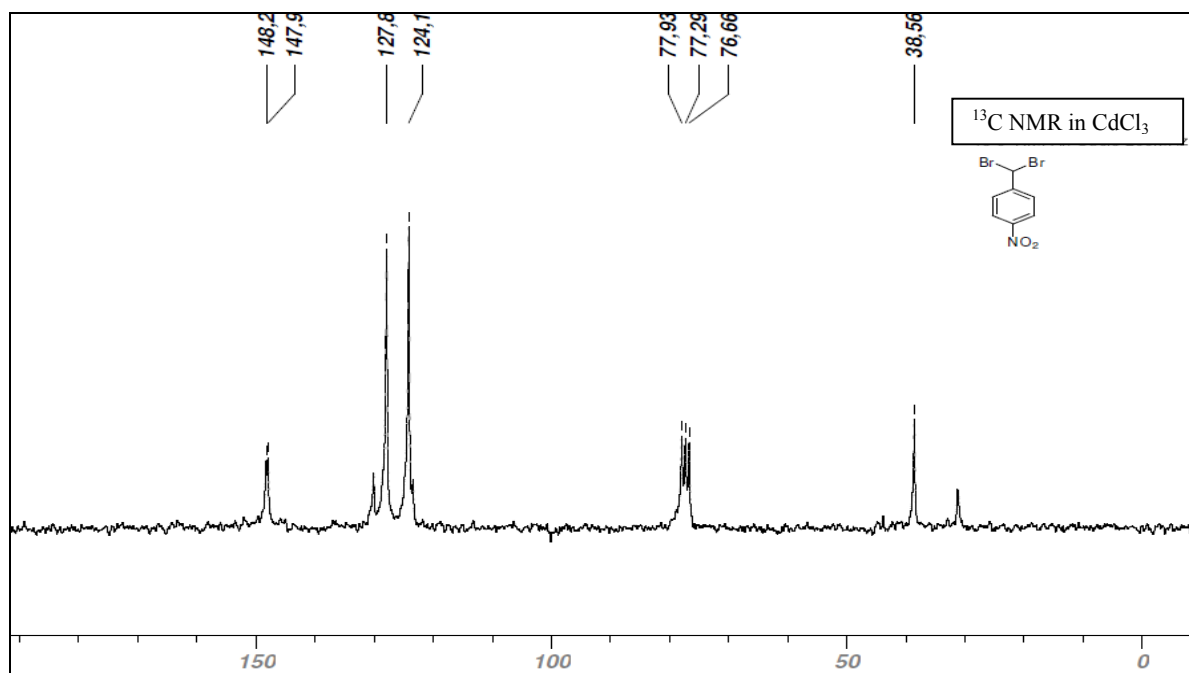

Electronic Supplementary Material (ESI) for Green Chemistry

This journal is © The Royal Society of Chemistry [year]

**Table S1.** Crystallization studies of 2:1 PNT/PNBBr in CCl<sub>4</sub>

| Entry | PNT<br>g/mmol | PNBBr<br>g/mmol | CCl <sub>4</sub> /mL | Solid<br>isolated/g | PNBBr purity<br>(GC-Area %) |
|-------|---------------|-----------------|----------------------|---------------------|-----------------------------|
| 1.    | 1.0/7.23      | 0.788/3.64      | 1.8                  | 1.78                | 33%                         |
| 2.    | 1.0/7.23      | 0.788/3.64      | 2.7                  | 1.78                | ”                           |
| 3.    | 1.0/7.23      | 0.788/3.64      | 3.6                  | 1.78                | ”                           |
| 4.    | 1.0/7.23      | 0.788/3.64      | 4.5                  | 0.97                | ”                           |
| 5.    | 1.0/7.23      | 0.788/3.64      | 5.4                  | 0.86                | ”                           |
| 6.    | 1.0/7.23      | 0.788/3.64      | 6.3                  | 0.82                | ”                           |
| 7.    | 1.0/7.23      | 0.788/3.64      | 7.2                  | 0.87                | 47.6                        |
| 8.    | 1.0/7.23      | 0.788/3.64      | 8.1                  | 0.73                | 53.8                        |
| 9.    | 1.0/7.23      | 0.788/3.64      | 9.0                  | 0.52                | 65.6                        |
| 10.   | 20/145.9      | 15.76/72.9      | 162                  | 15.6                | 64.6                        |

Electronic Supplementary Material (ESI) for Green Chemistry

This journal is © The Royal Society of Chemistry [year]

**Table S2:** Bromination reaction-cum-cold crystallization of PNBBBr in CCl<sub>4</sub> with recycle of mother liquor

| Batch No. | PNT Kg/ (mol) | Carbon tetrachloride (L)            | Br/mole | 98% H <sub>2</sub> SO <sub>4</sub> Kg (mol) | PNBBBr Kg/(mol) | Purity (GC area %) |
|-----------|---------------|-------------------------------------|---------|---------------------------------------------|-----------------|--------------------|
| 1         | 0.900 (6.56)  | 4.8                                 | 2.189   | 0.114 (1.14)                                | 0.364 (1.68)    | 97.1               |
| 2         | 0.231(1.68)   | Recycled mother liquor.             | 1.87    | 0.107 (1.07)                                | 0.368 (1.7)     | 95.7               |
| 3         | 0.233 (1.70)  | Recycled mother liquor.             | 1.89    | 0.107 (1.07)                                | 0.369 (1.7)     | 99.5               |
| 4         | 0.234 (1.70)  | Recycled mother liquor.             | 1.9     | 0.107 (1.07)                                | 0.373 (1.72)    | 100                |
| 5         | 0.236 (1.72)  | Recycled mother liquor.             | 1.92    | 0.095 (0.95)                                | 0.371 (1.71)    | 98.5               |
| 6         | 0.235 (1.71)  | Recycled mother liquor.             | 1.91    | 0.107 (1.07)                                | 0.411 (1.9)     | 96.3               |
| 7         | 0.260 (1.90)  | Recycled mother liquor.             | 2.11    | 0.107 (1.07)                                | 0.360 (1.66)    | 100                |
| 8         | 0.228 (1.66)  | Recycled mother liquor.             | 1.85    | 0.107 (1.07)                                | 0.330 (1.52)    | 98.8               |
| Total/Av  | 2.559 (18.63) | 4.5L Carbon tetrachloride recovered | 15.63   | 0.851 (8.51)                                | 2.947 (13.59)   | 98.2               |

**Syntheses details pertaining to Table S2**

0.9 kg (6.56 mol) of PNT was dissolved in 4.8 L of CCl<sub>4</sub> and added into a 10 L capacity glass reactor fitted with addition funnel and reflux condenser/distillation assembly. 1.09 L of brominating agent containing 2.189 mole active Br was added. The contents were heated to



Electronic Supplementary Material (ESI) for Green Chemistry

This journal is © The Royal Society of Chemistry [year]

reflux temperature and illuminated externally with 3 x 100 W tungsten filament bulbs. 112 g of 98% H<sub>2</sub>SO<sub>4</sub> (1.14 mol) in 0.6 L of water was taken in the addition funnel and the acid was added over a period of 2 h. (*Caution: If the reaction mass develops brown color stop the addition and allow color to disappear before continuing addition of acid.*) Reflux conditions were maintained for an additional 1 h. The reaction mass was allowed to cool to ca. 40°C temperature and the contents discharged into a separating column. The organic phase was poured into a suitable wide mouth glass vessel and kept for crystallization in a deep freezer after inserting 3 broomsticks to promote crystallization. The organic phase attained a temperature of -15°C and was removed after 12 hours. Crystal formation was seen. The contents were allowed to warm up to 0-4°C to re-dissolve PNT which had co-crystallized with the product. The lumps of crystals were broken up and the contents centrifuged in a continuous centrifuge, which operation required barely a couple of minutes. The collected PNBBBr weighed 0.364 kg (1.68 mol) and exhibited 97.1% (GC area %) purity. The mother liquor was placed back into the glass reactor. Fresh 0.231 kg (1.68 mol) of PNT, equivalent to the amount of PNBBBr recovered in the first batch, was added and brominating reagent was taken at the mole ratio as shown in Table S2 below. The reaction was repeated in the same manner as above but towards the end of the reaction 0.6 L of CCl<sub>4</sub> was collected by changing over from reflux mode to distillation mode and kept for chilling. Cold crystallization was repeated to obtain PNBBBr from the reaction mass. The crude PNBBBr was washed in the centrifuge with the chilled CCl<sub>4</sub> and centrifuged. The mother liquor and washings were once again recycled. Eight batches were carried out in all and the data on PNBBBr yield and purity for each batch and also the total yield and average purity are provided in the table S2. After the 8<sup>th</sup> batch, CCl<sub>4</sub> was recovered from the mother liquor and the residue was then subjected to vacuum distillation. For this purpose, the residue was first melted and purged with

Electronic Supplementary Material (ESI) for Green Chemistry

This journal is © The Royal Society of Chemistry [year]

nitrogen. Thereafter the temperature was raised to 140-155°C and the PNT distilled over at the reduced pressure of 10-40 mm Hg. The amount of PNT recovered was 0.514 kg (3.75 mol).

**Table S3.** Optimization of NaBH<sub>4</sub> concentration for the reduction of mother liquor obtained in Batch 8, Table 1 of manuscript

| Entry No. | NaBH <sub>4</sub> taken (with respect to the amount of PNBBR <sub>2</sub> ( <b>1</b> ) present in the reaction mixture) | % PNBBR <sub>2</sub> ( <b>1</b> ) | % PNBBR | % PNT |
|-----------|-------------------------------------------------------------------------------------------------------------------------|-----------------------------------|---------|-------|
| 1.        | 0 equiv.                                                                                                                | 80.72                             | 19.23   | 0.0   |
| 2.        | 2 equiv.                                                                                                                | 58.46                             | 41.56   | 0.0   |
| 3.        | 4 equiv.                                                                                                                | 52.14                             | 47.86   | 0.0   |
| 4.        | 6 equiv.                                                                                                                | 22.63                             | 77.37   | 0.0   |
| 5.        | 8 equiv.                                                                                                                | 4.94                              | 69.35   | 25.7  |

A solution was prepared by mixing PNBBR<sub>2</sub> and PNBBR for the optimization reaction of NaBH<sub>4</sub> reduction (from the GC-MS the initial mixture was found to be consisted of 80.72% PNBBR<sub>2</sub> and 19.23% PNT). Reduction reactions were carried out at room temperature with constant stirring for 2.5 h and solvent system was EDC and a few drops of methanol. Work-up was done using EDC-water mixture and with a small portion of separated organic layer GC-MS were recorded.

Electronic Supplementary Material (ESI) for Green Chemistry

This journal is © The Royal Society of Chemistry [year]

### Mass Balance related to the experimental results of Tables 1 and 2 in the manuscript

**Table S4.** Computation of Isolated yield of PNBBBr with respect to PNT consumed and reagent utilized based on the data of Tables 1 and 2 and response factors computed from Figure S1.

|     |                                                                                                                                                   |                         |
|-----|---------------------------------------------------------------------------------------------------------------------------------------------------|-------------------------|
| 1.  | Total PNT taken                                                                                                                                   | 746.0 mmol              |
| 2.  | PNT remaining in treated mother liquor suitable for perennial recycle                                                                             | 58.61 mmol              |
| 3.  | PNT which could have been separated from product through more efficient washing and recycled along with treated mother liquor of Batch 8, Table 1 | 28.54 mmol              |
| 4.  | Net PNT consumed                                                                                                                                  | 658.95 mmol             |
| 5.  | Total Br equivalents in <i>BR-S</i> taken                                                                                                         | 659.2                   |
| 5.  | Gross weight of crystalline PNBBBr obtained (96.9 % purity w/w)                                                                                   | 126.3 g                 |
| 6.  | Actual PNBBBr amount in solid product in g/mmol                                                                                                   | 122.39 g<br>566.62 mmol |
| 7.  | PNBBBr in treated mother liquor suitable for perennial recycle                                                                                    | 81.15 mmol              |
| 8.  | Total isolated and recoverable PNBBBr                                                                                                             | 647.77 mmol             |
| 9.  | Yield of isolated and recoverable PNBBBr with respect to PNT amount actually consumed and considering recycle of the rest of the amount taken     | 98.30                   |
| 10. | Yield of isolated and recoverable PNBBBr with respect to “Br” equivalents in <i>BR-S</i> amount taken                                             | 98.26                   |
